# Supplementary material for: Topochemical synthesis of Bi2O3 microribbons derived from a bismuth oxalate precursor as high-performance lithium-ion batteries
Source: Royal Society of Chemistry journal article supplement (doi:10.1039/c4ra00877d), 2014-01-01
Supplement: c4ra00877d1.pdf [file c4ra00877d1.pdf]

## Electronic Supplementary Information

### **Topochemical synthesis of Bi<sub>2</sub>O<sub>3</sub> microribbons and their application in lithium-ion batteries†**

Hai Wang, Hongxing Yang,\* and Lin Lu

Renewable Energy Research Group (RERG), Department of Building Services Engineering, The Hong Kong Polytechnic University, Room: ZN816, Kowloon, Hong Kong, China. Fax: +852-27746146; Tel: +852-27665863; E-mail: bxhxyang@polyu.edu.hk.

### **Figure captions**

**Fig. S1** The FESEM images of  $\text{Bi}(\text{C}_2\text{O}_4)\text{OH}$  at different reaction time. (a) 4 h; (b) 6 h and (c) 10 h.

**Fig. S2** Comparison of the crystal structures of  $\text{Bi}(\text{C}_2\text{O}_4)\text{OH}$  and  $\text{Bi}_2\text{O}_3$  at different view a, b, and c axis, respectively.

**Fig. S3.** The FESEM images of as-made A- $\text{Bi}_2\text{O}_3$  after the thermal decomposition at 400 °C for 1 h.

**Fig. S4.** EDX spectra of A- $\text{Bi}_2\text{O}_3$  microribbons. The elemental composition for A- $\text{Bi}_2\text{O}_3$  microribbons with atomic and weight percentage has been given in the inset table.

### **Table Captions**

**Tab. 1** The comparison of crystal structures of  $\text{Bi}(\text{C}_2\text{O}_4)\text{OH}$  and  $\text{Bi}_2\text{O}_3$ .

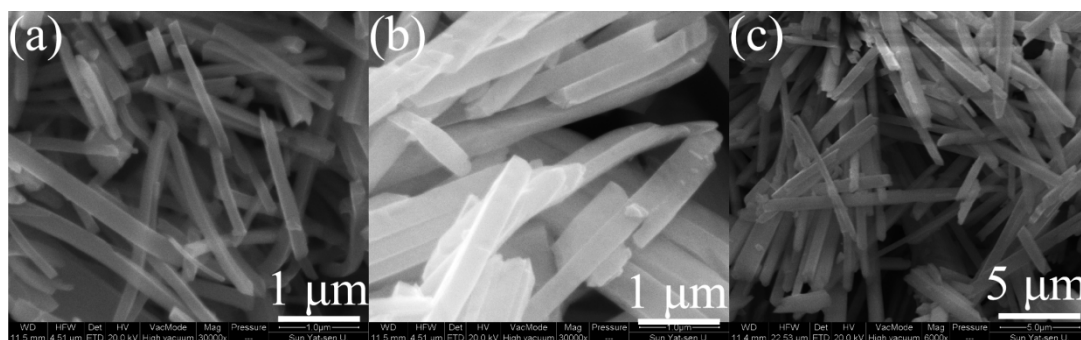

**Fig. S1** The FESEM images of  $\text{Bi}(\text{C}_2\text{O}_4)\text{OH}$  at different reaction time. (a) 4 h; (b) 6 h and (c) 10 h.

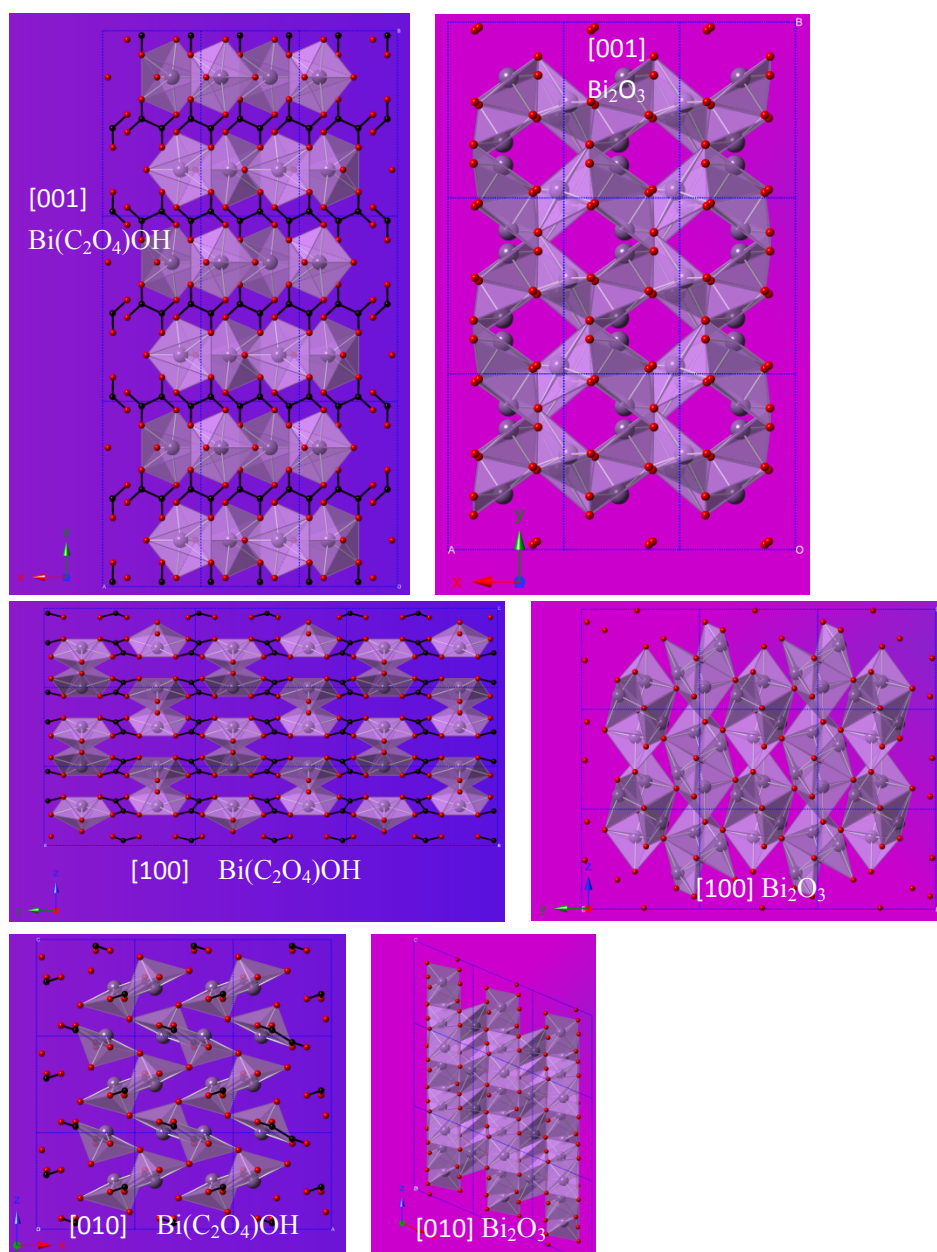

**Fig. S2** Comparison of the crystal structures of  $\text{Bi}(\text{C}_2\text{O}_4)\text{OH}$  and  $\text{Bi}_2\text{O}_3$  at different view a, b, and c axis, respectively.

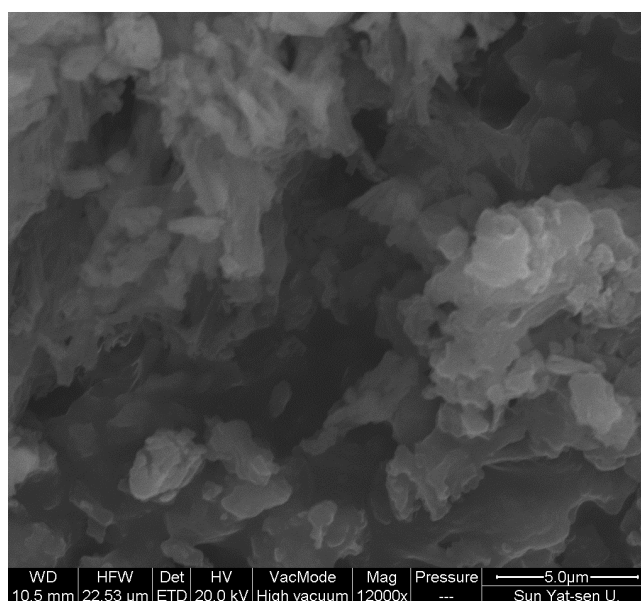

**Fig. S3.** The FESEM images of as-made A-Bi<sub>2</sub>O<sub>3</sub> after the thermal decomposition at 400 °C for 1 h.

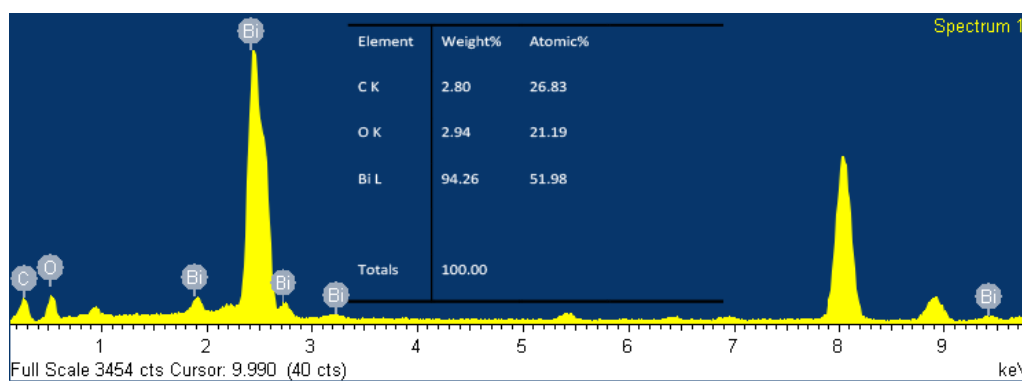

**Fig. S4.** EDX spectra of A-Bi<sub>2</sub>O<sub>3</sub> microribbons. The elemental composition for A-Bi<sub>2</sub>O<sub>3</sub> microribbons with atomic and weight percentage has been given in the inset table.

**Tab. 1** The comparison of crystal structures of Bi(C<sub>2</sub>O<sub>4</sub>)OH and Bi<sub>2</sub>O<sub>3</sub>.

| Unit cells parameters                | Space-group                    | a (Å)     | b (Å)      | c (Å)     | V (Å <sup>3</sup> ) |
|--------------------------------------|--------------------------------|-----------|------------|-----------|---------------------|
| Bi(C <sub>2</sub> O <sub>4</sub> )OH | <i>Pnma</i> (62)-orthorhombic  | 6.0853(2) | 11.4479(3) | 5.9722(2) | 416.05(2)           |
| Bi <sub>2</sub> O <sub>3</sub>       | <i>P121/c1</i> (14)-monoclinic | 5.8496(3) | 8.1648(4)  | 7.5101(4) | 330.23(3)           |
